# Supplementary material for: A PLC based semi-automated extraction chromatographic separation system for the isolation of medical grade no-carrier-added lutetium-177 for targeted cancer therapy
Source: Royal Society of Chemistry journal article supplement (doi:10.1039/d4re00574k), 2025-01-01

## **A PLC based Semi-automated Extraction Chromatographic Separation system for the isolation of medical grade No-carrier-added Lutetium-177 for Targeted Cancer Therapy**

Dheeraj Kumar,<sup>1,4</sup> Aaditya Shah,<sup>1</sup> Varun Nair,<sup>1</sup> B.K. Tiwary,<sup>1</sup> N.C. Joseph,<sup>1</sup> Abhishek K. Sharma,<sup>1</sup> Arpit Mitra,<sup>1</sup> Navin Sakhare,<sup>1</sup> Sanjeev Kumar,<sup>1</sup> Chanda Arjun,<sup>1</sup> K.V.V. Nair,<sup>2</sup> Anupam Mathur,<sup>1,\*</sup> Sudipta Chakraborty,<sup>2</sup> Usha Pandey,<sup>1</sup> Ameya Puranik,<sup>3</sup> Archi Agrawal,<sup>3</sup> Venkatesh Rangarajan<sup>3</sup>

<sup>1</sup>*Radiopharmaceuticals Program, Board of Radiation and Isotope Technology, Vashi, Navi Mumbai-400703, India.*

<sup>2</sup>*Radiopharmaceuticals Division, Bhabha Atomic Research Center, Trombay, Mumbai-400085, India.*

<sup>3</sup>*Tata Memorial Centre, Parel, Mumbai-400012, India.*

<sup>4</sup>*Chemical Sciences, Homi Bhabha National Institute, Anushakti Nagar, Mumbai-400094, India*

**\*Author for correspondence:** Dr. Anupam Mathur  
Radiopharmaceuticals Program  
Board of Radiation and Isotope Technology  
Navi Mumbai - 400 703  
India

Telephone : 91-22-2788 7202

E-mail : amathur@britatom.gov.in

**Table S1 : Determination of organic carbon content in NCA  $^{177}\text{LuCl}_3$  using chemical oxygen demand (COD) analysis**

| <b>S. No</b>  | <b>COD value</b> |
|---------------|------------------|
| 1             | 4 mg/L           |
| 2             | 6 mg/L           |
| Water (Blank) | 6 mg/L           |

A chemical oxygen demand analysis was performed to determine the amount of total organic carbon content in the final product. Results obtained were same as that for blank measurement.

Figure S1 HPGe profile of NCA <sup>177</sup>Lu

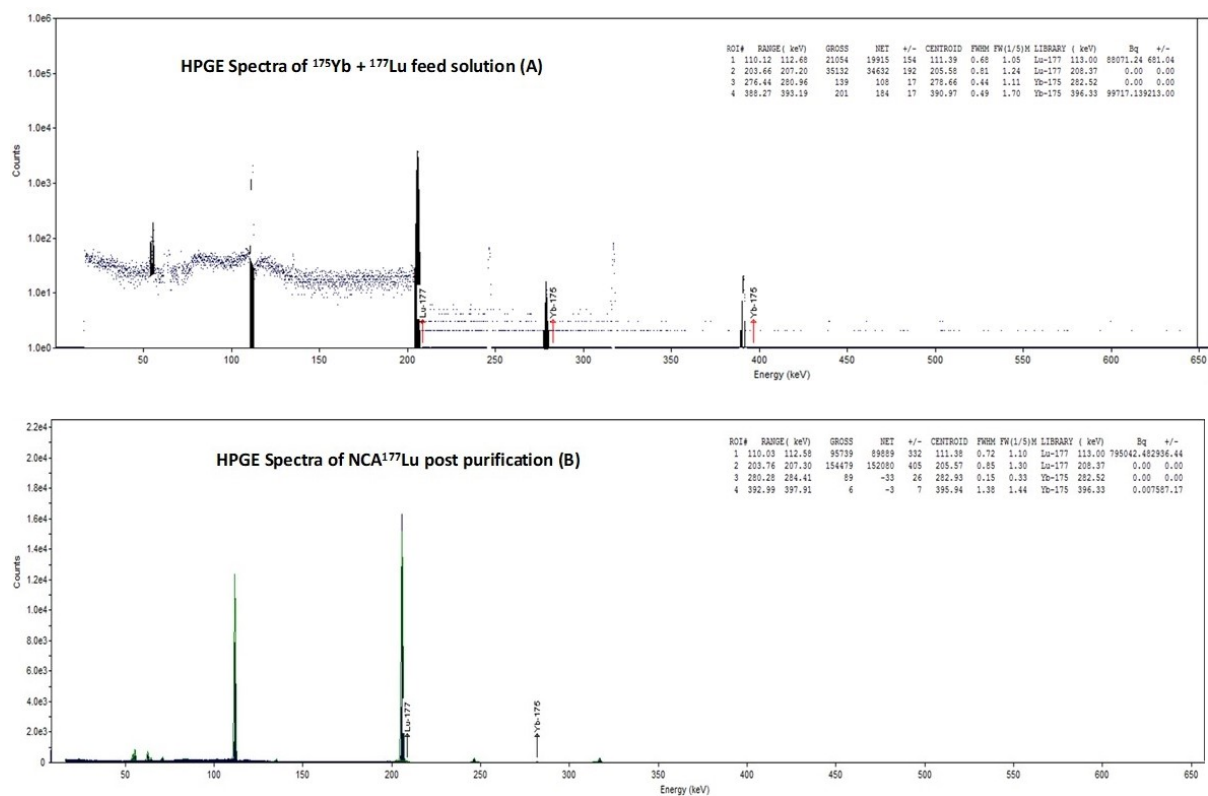

**Figure S2:  $^1\text{H}$ -NMR and  $^{13}\text{C}$ -NMR (1100 scans) of decayed NCA  $^{177}\text{Lu}$  sample\* in  $\text{CD}_3\text{CN}$  (Determination of organic impurity)**

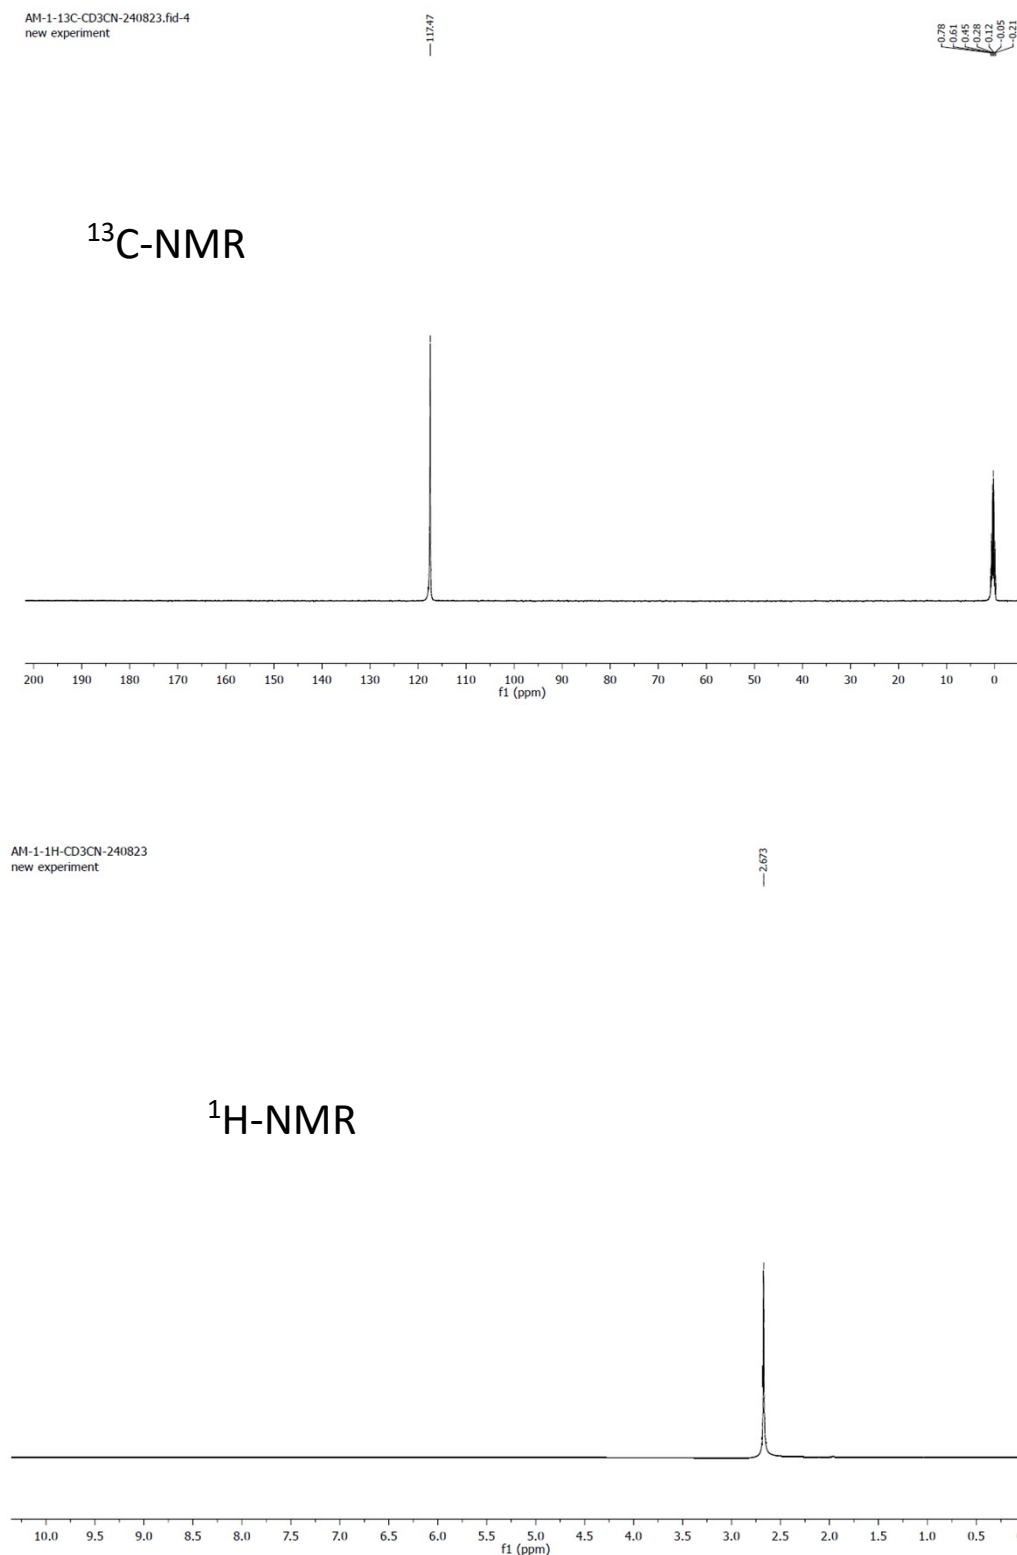

\*Sample used for NMR analysis corresponded to 0.925 GBq (25 mCi) of the total NCA  $^{177}\text{LuCl}_3$  product separated from 50 mg of irradiated enriched  $^{176}\text{Yb}$  target. **No peaks from organic carbon and protons were observed.**

**Figure S3** RCP determination of NCA  $^{177}\text{LuCl}_3$  using Paper chromatography (PC), TLC and HPLC

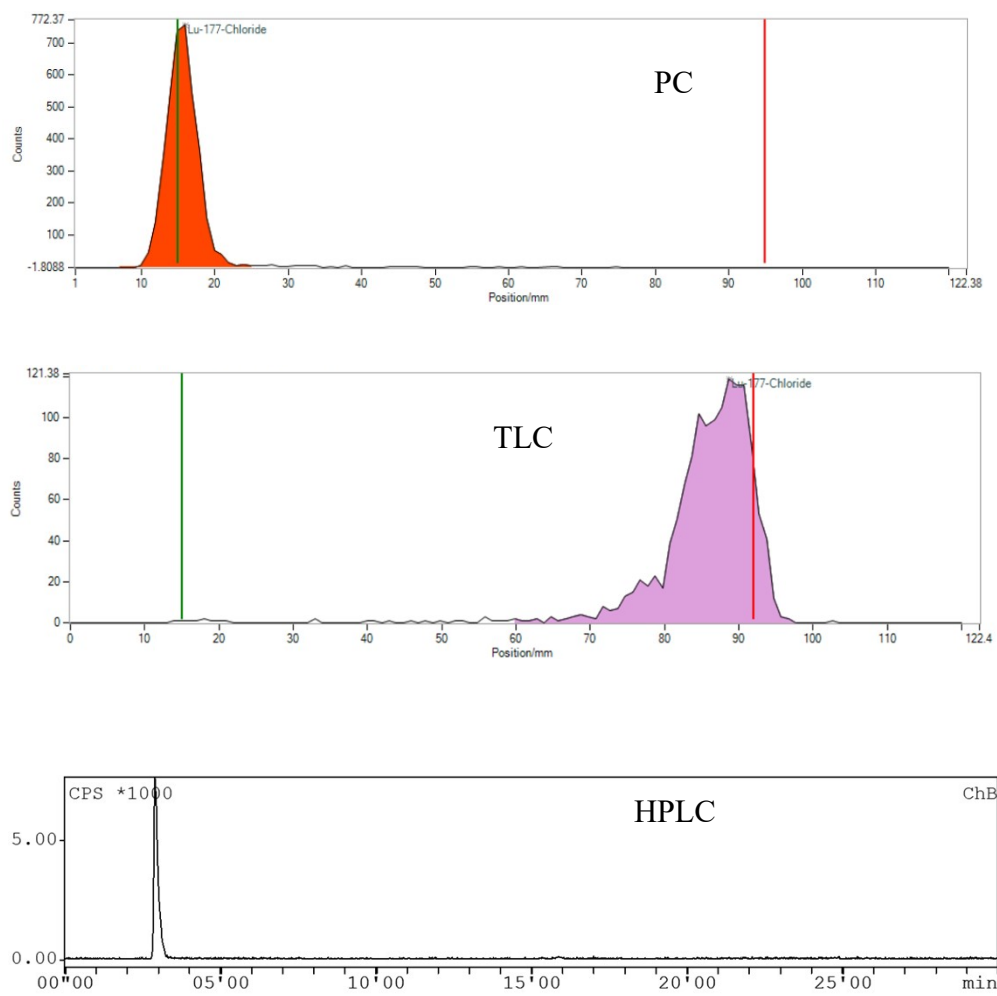

**Figure S4** Radiochemical purity determination of NCA  $^{177}\text{Lu}$ -DOTA-TATE and NCA  $^{177}\text{Lu}$ -PSMA-617 by HPLC and PC (inset)

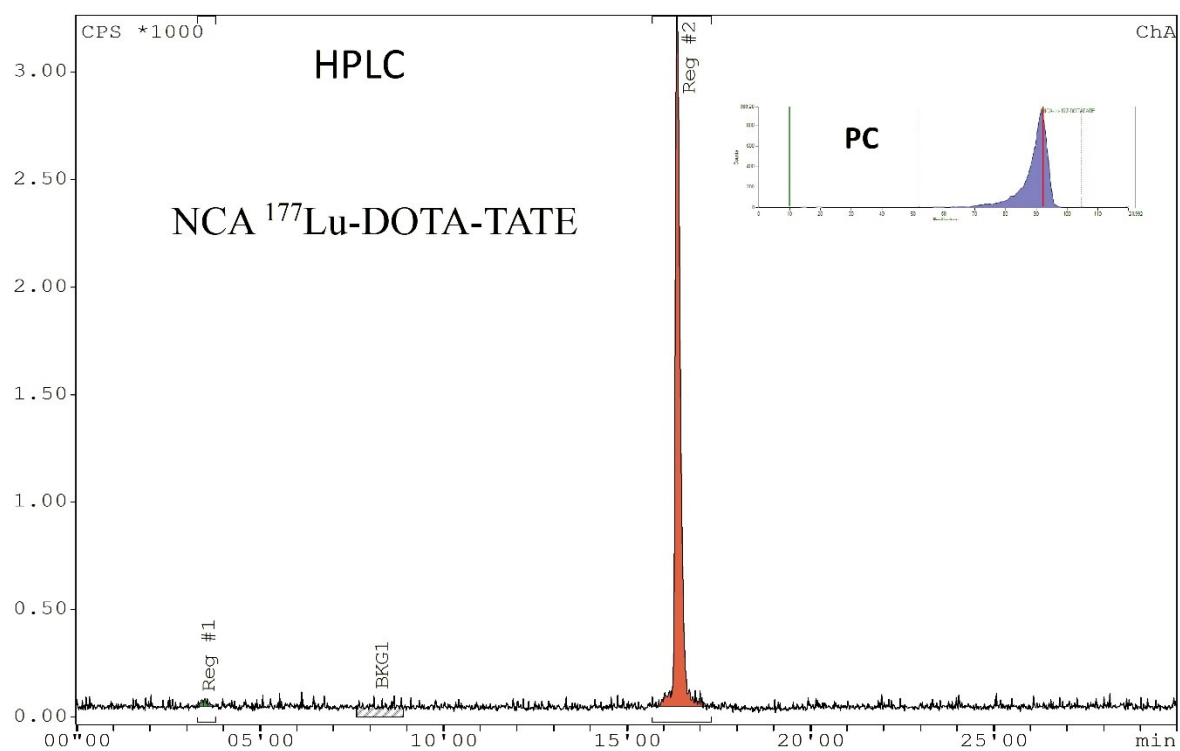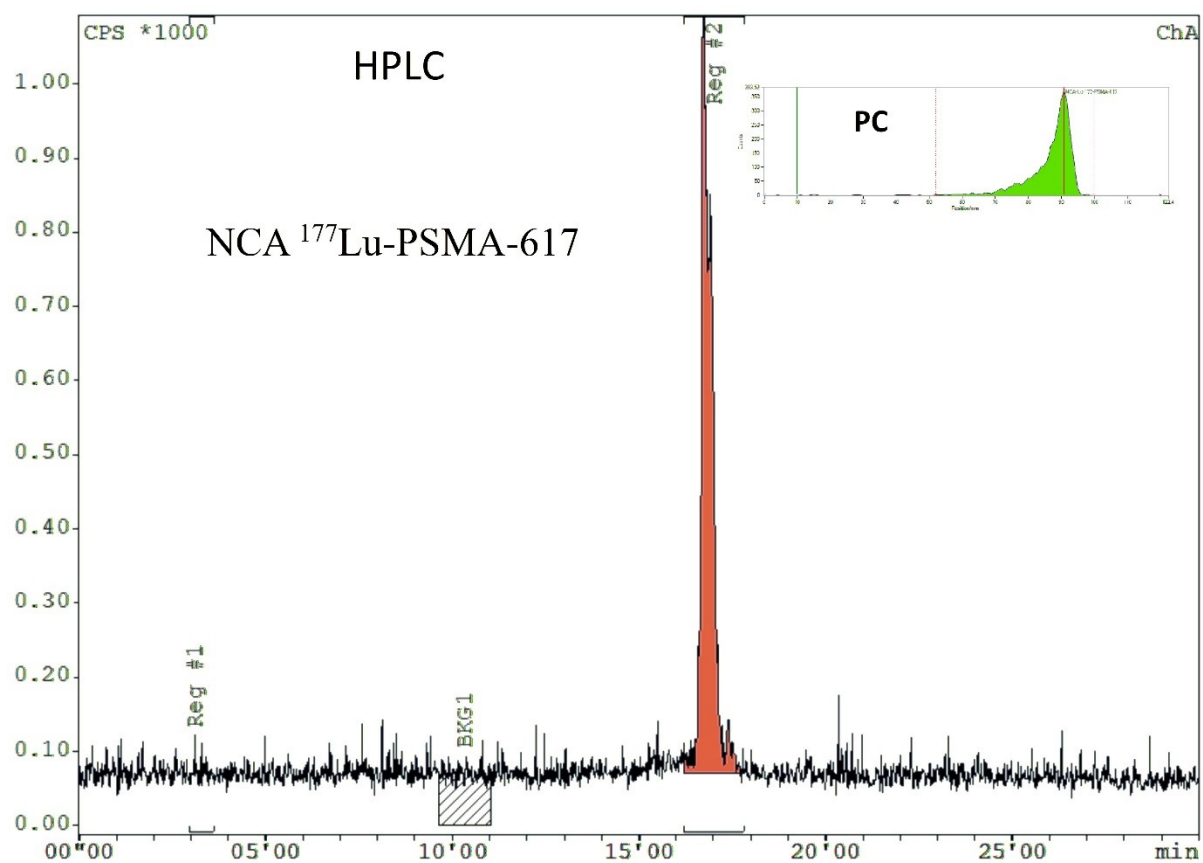

**Figure S5** NCA  $^{177}\text{Lu}$ -DOTA-TATE post-therapy scan in cancerous lesion of Meningioma patient (24 h p.i.) (5.5 GBq activity was injected)

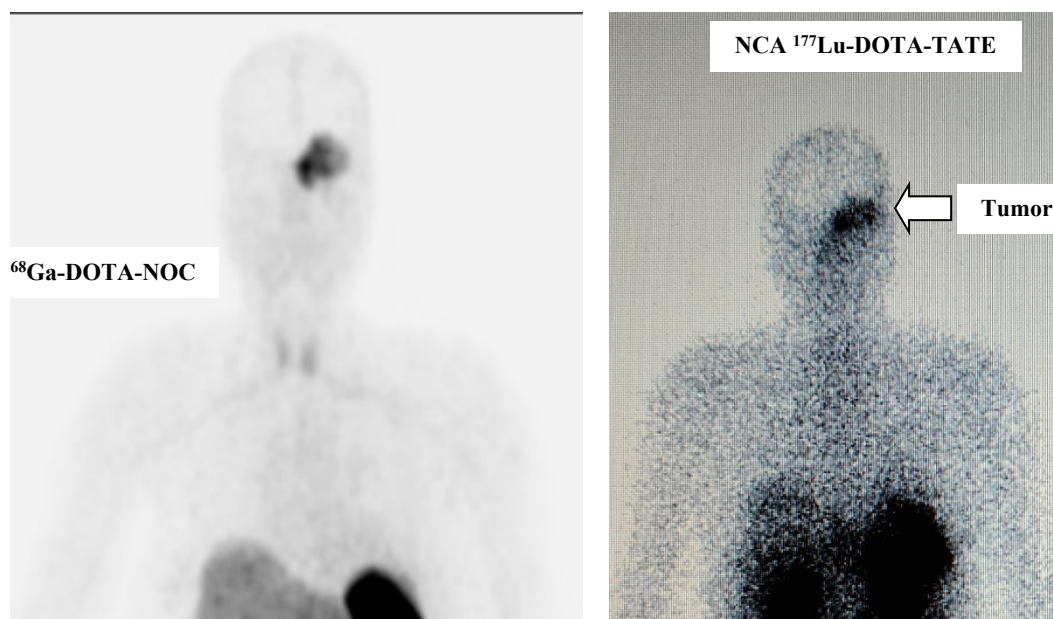

**Figure S6** NCA  $^{177}\text{Lu}$ -PSMA-617 post-therapy scan in metastatic prostatic adenocarcinoma patient (24 p.i.) (7.4 GBq activity was injected)

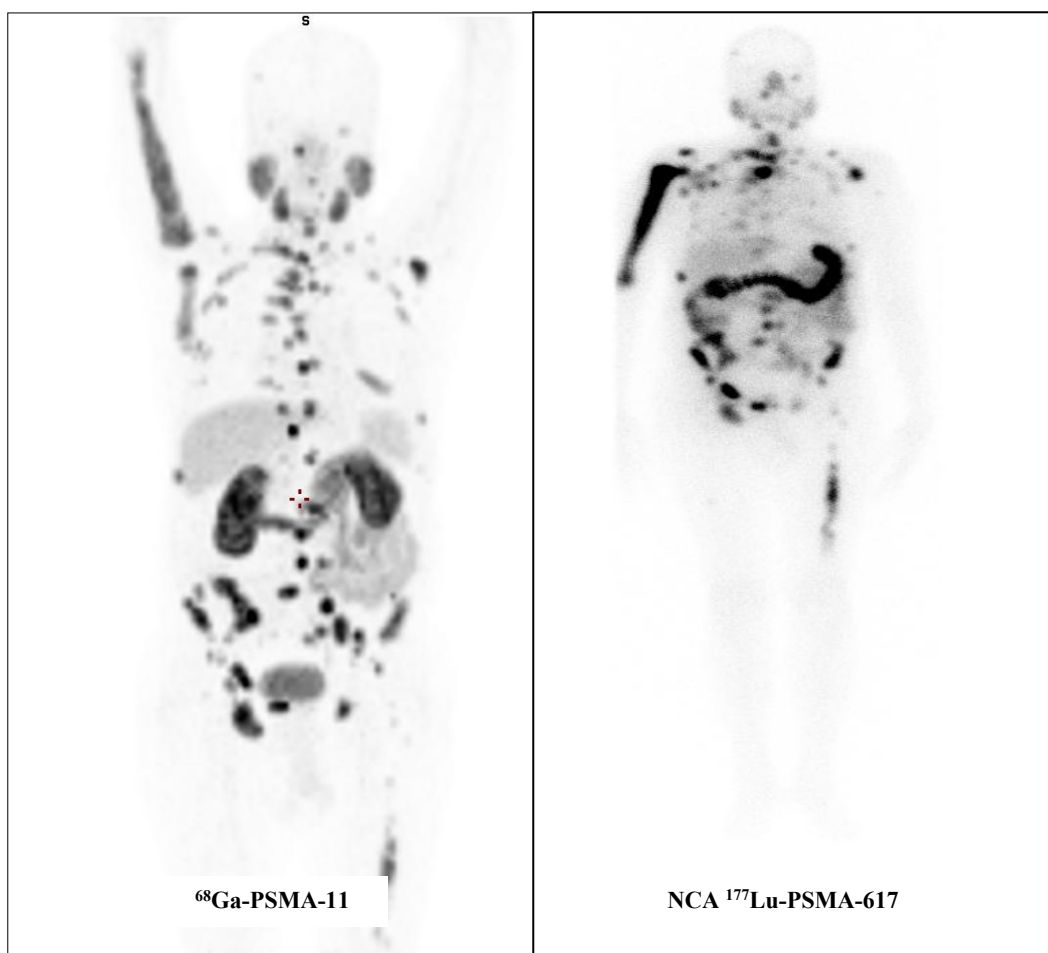

Supplement: d4re00574k1.pdf [file d4re00574k1.pdf]
